# Supplementary material for: Ethidium bromide-bridged mesoporous silica hybrid nanocarriers for fluorescence cell imaging and drug delivery applications
Source: Royal Society of Chemistry journal article supplement (doi:10.1039/d1nj03520g), 2021-01-01
Supplement: d1nj03520g1.pdf [file d1nj03520g1.pdf]

## **Ethidium bromide-bridged mesoporous silica hybrid nanocarriers for fluorescent cell imaging and drug delivery applications**

Madhappan Santhamoorthy<sup>a</sup>, Kokila Thirupathi<sup>b</sup>, Thirukumaran Periyasamy<sup>a</sup>, Dinakaran Thirumalai,<sup>c</sup> Vanaraj Ramkumar<sup>a</sup> and Seong-Cheol Kim<sup>a\*</sup>

<sup>a</sup>School of Chemical Engineering, Yeungnam University, Gyeongsan, 38544, Republic of Korea.

<sup>b</sup>Department of Physics, Sri Moogambigai College of Arts and science for Women, Palacode, 636808, Tamil Nadu, India.

<sup>c</sup>Department of Cogno-Mechatronics Engineering, College of Nanoscience and Nanotechnology, Pusan National University, Busan 46241, Republic of Korea.

Email: sckim07@ynu.ac.kr

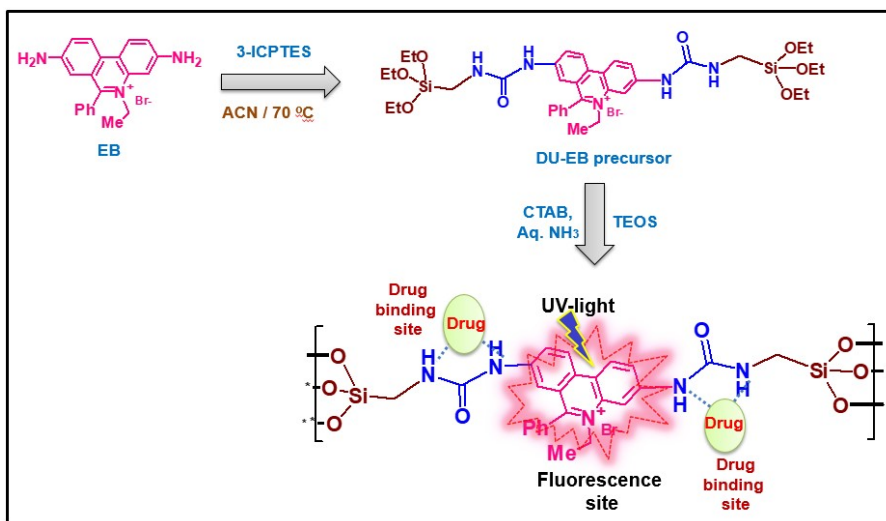

**Scheme S1.** Synthesis of DU-EB precursor; and DU-EB-MSH materials.

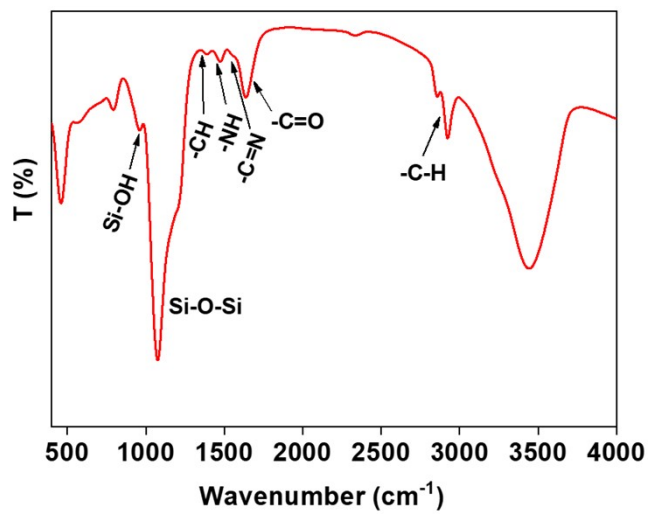

**Figure S1.** FT-IR spectrum of the synthesized DU-EB@MSH materials.

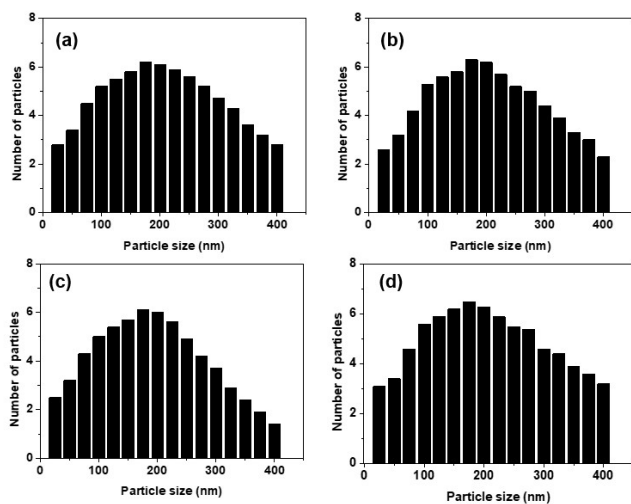

**Figure S2.** Particle size distribution of the DU-EB@MSH materials at (a) pH 3.0; (b) pH 5.0; (c) pH 7.4; and (d) pH 10, respectively.

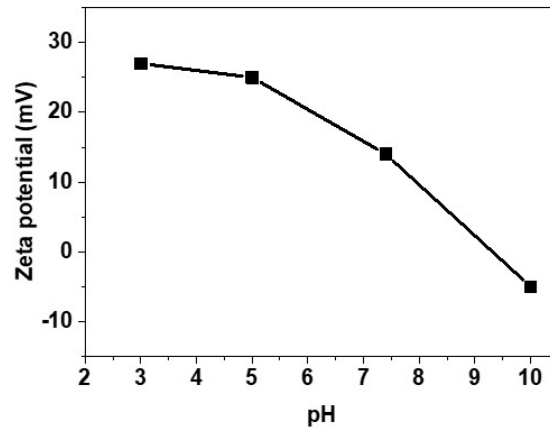

**Figure S3.** Zeta potential of the DU-EB@MSH materials.

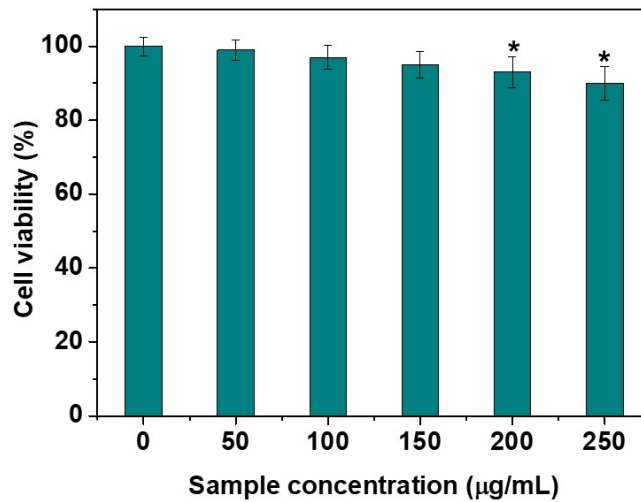

**Figure S4.** In vitro cell cytocompatibility of the MRC-5 cells treated at different concentration of DU-EB@MSH material. The data represent three separate experiments. Mean values  $\pm$  SD. \*P<0.05 versus a control group.

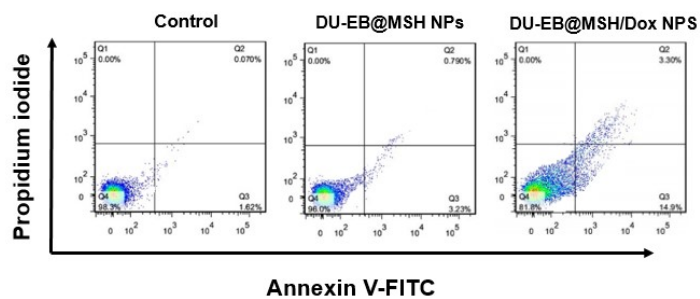

**Figure S5.** Flow cytometry analysis of control and DU-EB@MSH/Dox nanoparticles treated on MCF-7 cells.

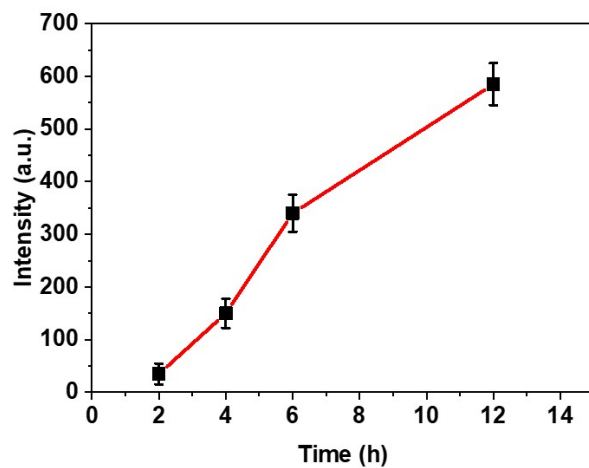

**Figure S6.** Fluorescence intensity of the DU-EB@MSH materials at different time after incubating the samples with MCF-7 cells.
